# Supplementary figures and images for: Study of Ultraviolet Emission Spectra in ZnO Thin Films
Source: Hindawi journal article supplement (doi:10.1155/2013/797232), 2012-10-31

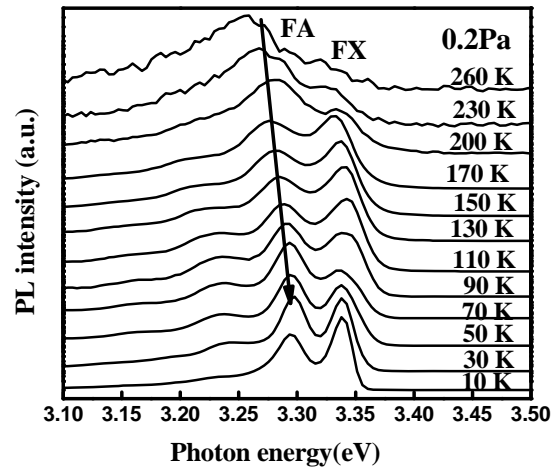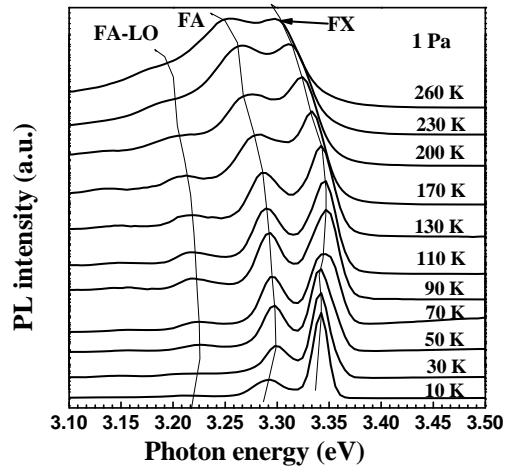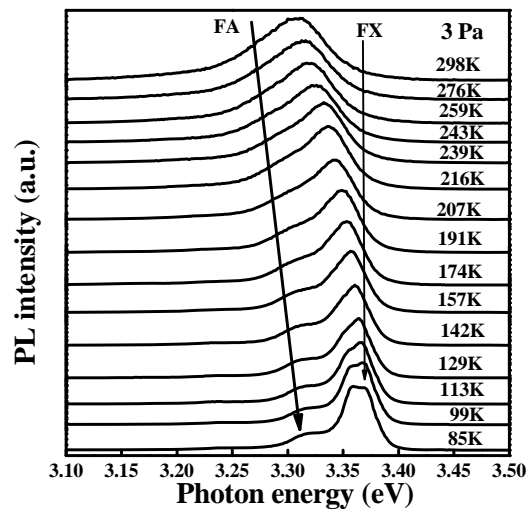

Supplement: f1 [file 797232.f1.pdf]
